# Supplementary material for: Hot Melt Extrusion as an Effective Process in the Development of Mucoadhesive Tablets Containing Scutellariae baicalensis radix Extract and Chitosan Dedicated to the Treatment of Oral Infections
Source: MDPI journal article supplement (doi:10.3390/ijms24065834), 2023-03-19
Supplement: s1 [file s1]

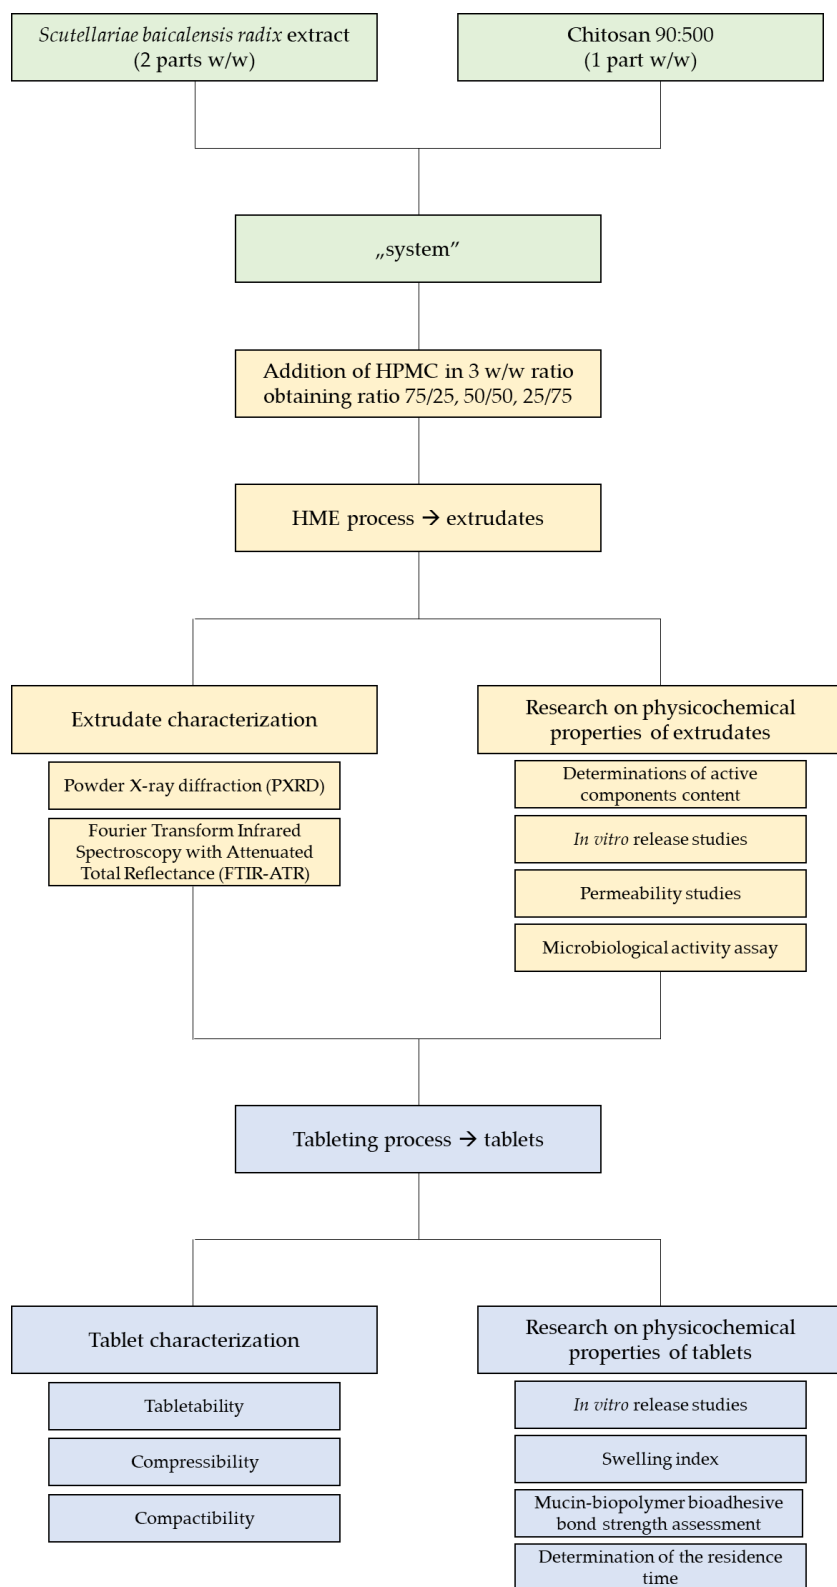

Figure S1. Flow chart of all experimental works (stages of system development are marked in green, stages of HME process development are marked in yellow, and stages of tableting process development are marked in blue).

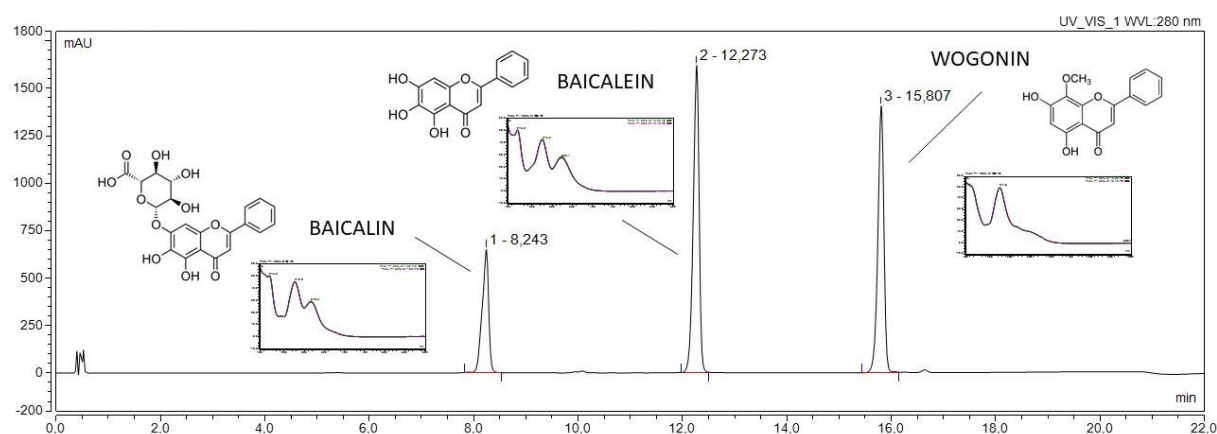

Figure S2. Chromatogram of standards.

Table S1. Validation parameters of HPLC method

| Parameter                                          | Baicalin                           | Baicalein                          | Wogonin                            |
|----------------------------------------------------|------------------------------------|------------------------------------|------------------------------------|
| Linearity: $y = ax + b$                            |                                    |                                    |                                    |
| $a \pm S_a$                                        | $0.5449 \pm 0.0218$                | $0.7326 \pm 0.0214$                | $1.6129 \pm 0.0321$                |
| $b \pm S_b$                                        | insignificant<br>( $\alpha=0.05$ ) | insignificant<br>( $\alpha=0.05$ ) | insignificant<br>( $\alpha=0.05$ ) |
| Correlation coefficient (r)                        | 0.9984                             | 0.9991                             | 0.9996                             |
| Range of linearity [mg/mL]                         | 0.0520–5.200                       | 0.0870–0.8700                      | 0.0320–0.3200                      |
| Limit of detection (LOD) [ $\mu\text{g/mL}$ ]      | 48.0278                            | 58.7691                            | 14.7156                            |
| Limit of quantification (LOQ) [ $\mu\text{g/mL}$ ] | 145.5388                           | 178.0883                           | 44.5927                            |

Table S2. Mathematical models of release profiles of formulations F1-F6

| Formulation |                      | Mathematical model |                |                     |                |                 |                |                          |                |
|-------------|----------------------|--------------------|----------------|---------------------|----------------|-----------------|----------------|--------------------------|----------------|
| No.         | Compression pressure | Zero-order kinetic |                | First-order kinetic |                | Higuchi kinetic |                | Korsmeyer-Peppas kinetic |                |
|             |                      | K                  | R <sup>2</sup> | K                   | R <sup>2</sup> | K               | R <sup>2</sup> | n                        | R <sup>2</sup> |
| F1          | 20 MPa               | 21.01              | 0.72           | 0.67                | 0.33           | <b>18.50</b>    | <b>0.97</b>    | 0.77                     | 0.84           |
|             | 40 MPa               | 19.76              | 0.73           | 0.66                | 0.34           | <b>17.34</b>    | <b>0.97</b>    | 0.77                     | 0.83           |
|             | 60 MPa               | 20.91              | 0.79           | 0.71                | 0.40           | <b>17.09</b>    | <b>0.98</b>    | 0.82                     | 0.83           |
| F2          | 20 MPa               | <b>24.59</b>       | <b>0.97</b>    | 0.81                | 0.55           | 16.52           | 0.90           | <b>0.90</b>              | <b>0.83</b>    |
|             | 40 MPa               | <b>23.82</b>       | <b>0.97</b>    | 0.84                | 0.60           | 15.64           | 0.88           | <b>0.93</b>              | <b>0.83</b>    |
|             | 60 MPa               | <b>24.13</b>       | <b>0.99</b>    | 0.87                | 0.65           | 15.18           | 0.84           | <b>0.94</b>              | <b>0.82</b>    |
| F3          | 20 MPa               | 21.23              | 0.72           | 0.69                | 0.36           | <b>18.51</b>    | <b>0.97</b>    | 0.79                     | 0.84           |
|             | 40 MPa               | 21.62              | 0.79           | 0.70                | 0.38           | <b>17.86</b>    | <b>0.98</b>    | 0.80                     | 0.84           |
|             | 60 MPa               | 22.63              | 0.83           | 0.74                | 0.42           | <b>17.76</b>    | <b>0.97</b>    | 0.84                     | 0.85           |
| F4          | 20 MPa               | <b>24.62</b>       | <b>0.94</b>    | 0.84                | 0.57           | 16.80           | 0.91           | <b>0.92</b>              | <b>0.85</b>    |
|             | 40 MPa               | <b>23.85</b>       | <b>0.95</b>    | 0.83                | 0.57           | 16.15           | 0.90           | <b>0.92</b>              | <b>0.84</b>    |
|             | 60 MPa               | <b>23.00</b>       | <b>0.97</b>    | 0.83                | 0.58           | 15.40           | 0.90           | <b>0.92</b>              | <b>0.83</b>    |
| F5          | 20 MPa               | 21.79              | 0.76           | 0.70                | 0.37           | <b>18.33</b>    | <b>0.98</b>    | 0.80                     | 0.85           |
|             | 40 MPa               | 21.93              | 0.82           | 0.72                | 0.40           | <b>17.49</b>    | <b>0.98</b>    | 0.82                     | 0.84           |
|             | 60 MPa               | 21.16              | 0.89           | 0.79                | 0.49           | <b>17.76</b>    | <b>0.95</b>    | 0.88                     | 0.85           |
| F6          | 20 MPa               | <b>24.53</b>       | <b>0.94</b>    | 0.84                | 0.57           | 16.82           | 0.91           | <b>0.92</b>              | <b>0.85</b>    |
|             | 40 MPa               | <b>23.82</b>       | <b>0.94</b>    | 0.93                | 0.57           | 16.32           | 0.91           | <b>0.92</b>              | <b>0.84</b>    |
|             | 60 MPa               | <b>22.80</b>       | <b>0.96</b>    | 0.82                | 0.57           | 15.41           | 0.91           | <b>0.92</b>              | <b>0.83</b>    |
